# Supplementary material
Source: PubMed Central journal article supplement (PMC2629210)
Supplement: 0804333106_0804333106SI.pdf [file 0804333106_0804333106SI.pdf]

# Supporting Information

Sussan *et al.* 10.1073/pnas.0804333106

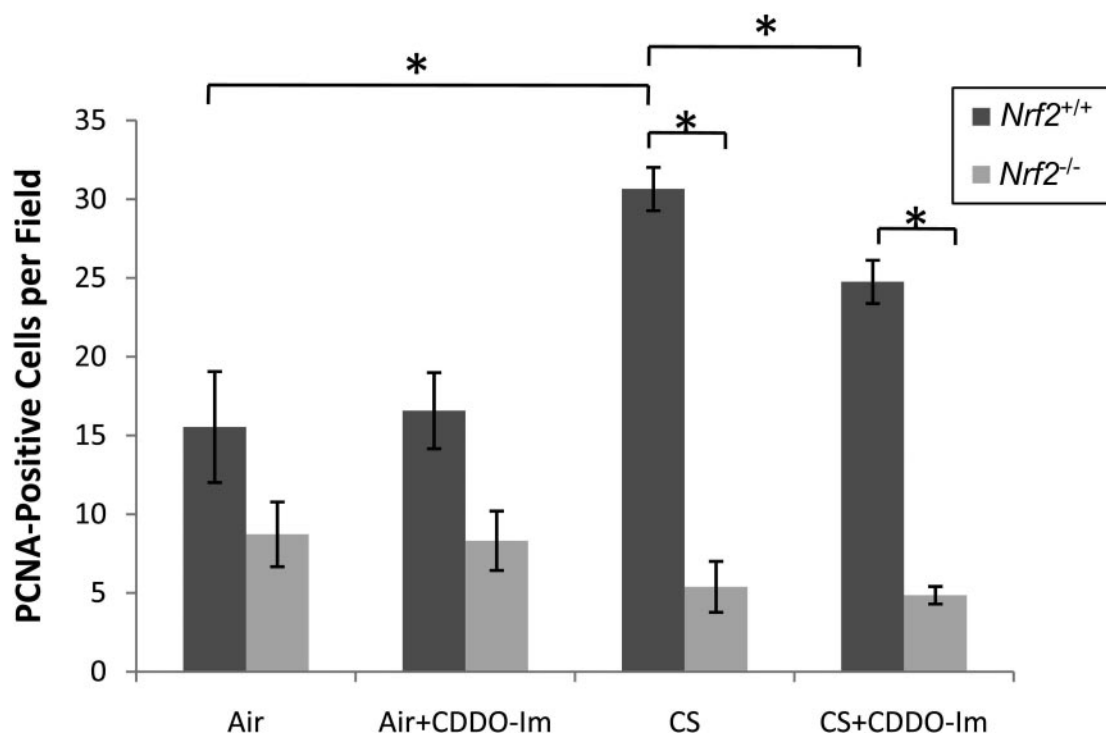

Fig. S1. Cell proliferation in lungs after exposure to CS for 6 months. The number of proliferating cell nuclear antigen (PCNA)-positive cells was quantified for 15 fields. Data represent mean  $\pm$  SEM.  $n = 4$  per group. \*,  $P < 0.05$  by Student's 2-tailed  $t$  test.

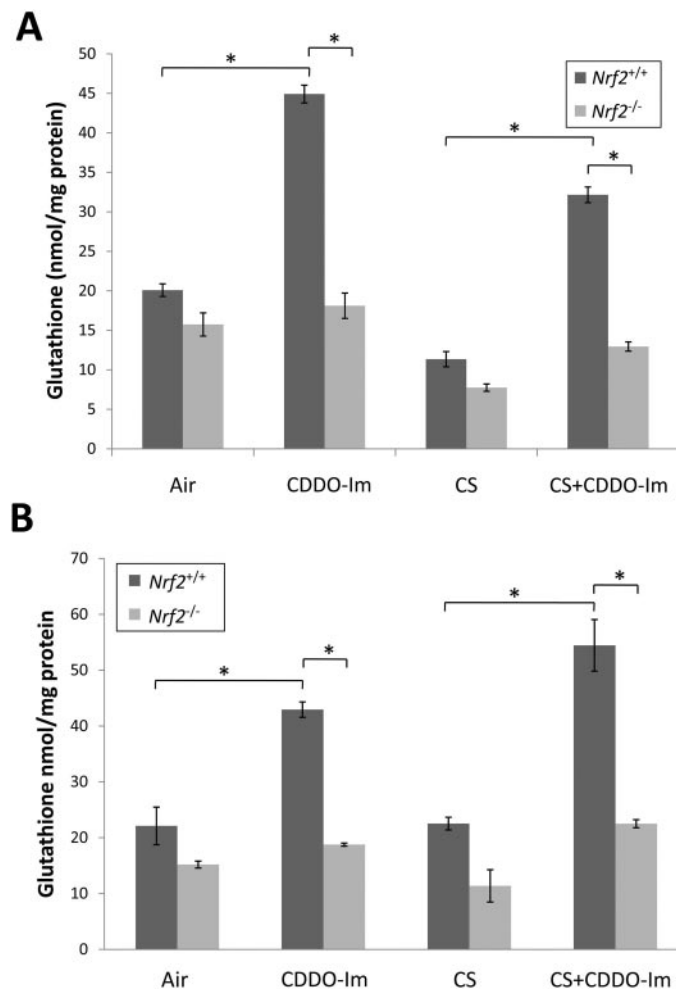

**Fig. S2.** Concentration of total glutathione after exposure to CS for either 1 day (A) or 1 month (B) in *Nrf2*<sup>+/+</sup> and *Nrf2*<sup>-/-</sup> mice that were treated with either CDDO-Im or vehicle control. *n* = 3 per group. \*, *P* < 0.05 by Student's 2-tailed *t* test.

**A**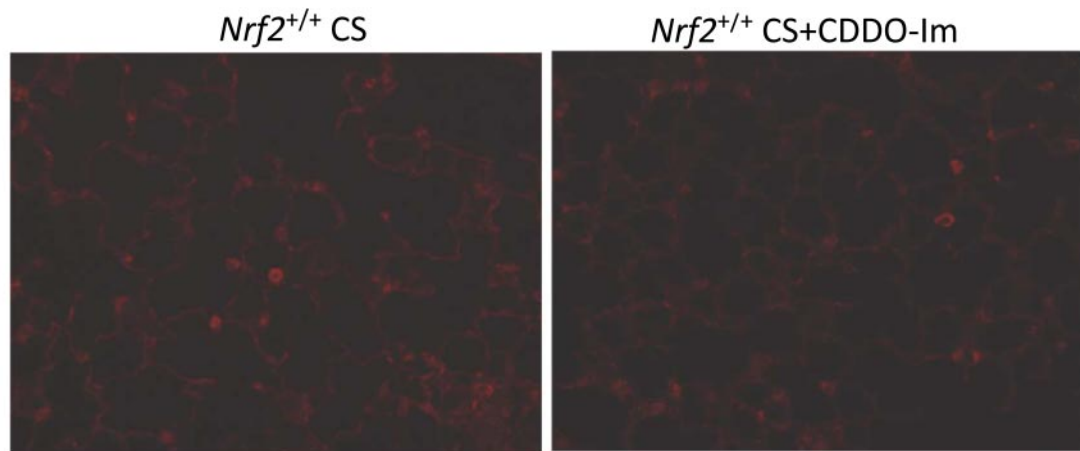**B**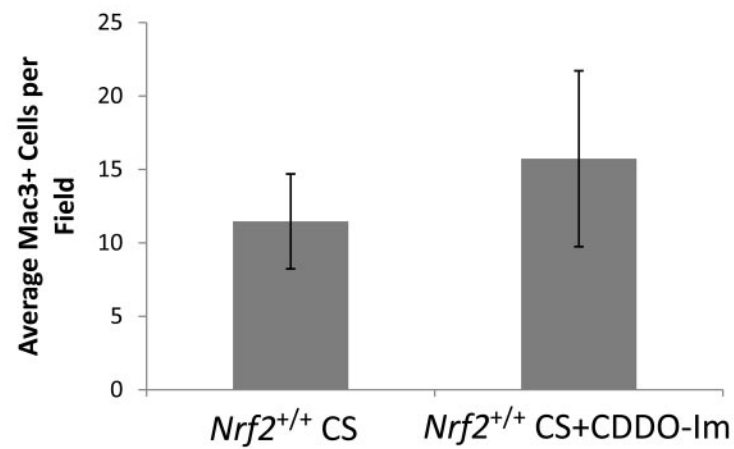**C**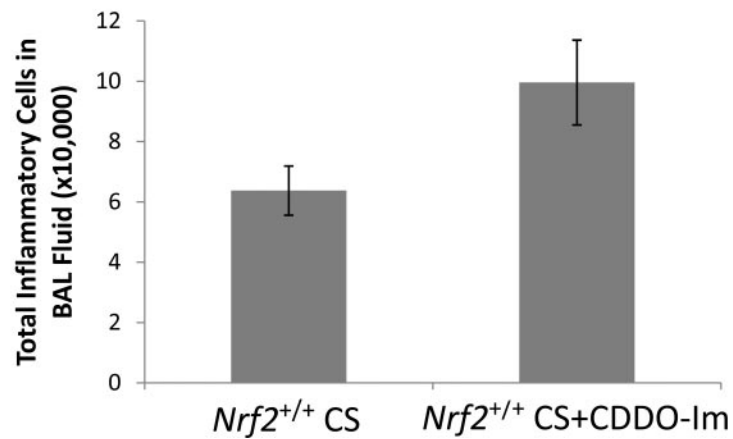

**Fig. S3.** Inflammation in lungs after either chronic (A and B) or acute (C) exposure to CS. (A) Representative images of Mac3-stained slides (Magnification: 100 $\times$ ). (B) Average number of Mac3(+) cells per field. Five fields were captured for each mouse.  $n = 3$  mice per group. (C) Average number of inflammatory cells in bronchoalveolar lavage fluid. Cells were harvested 18 h after a 6-h CS exposure.  $n = 6$  per group. Differences between groups were not statistically significant.
